# Supplementary material for: COVID-19 Crisis: An Update on the Disruption of Clinical trials
Source: Preprints.org preprint supplement (doi:10.20944/preprints202005.0411.v1), 2020-05-25
Supplement: Supplementary file 1 [file supplementary]

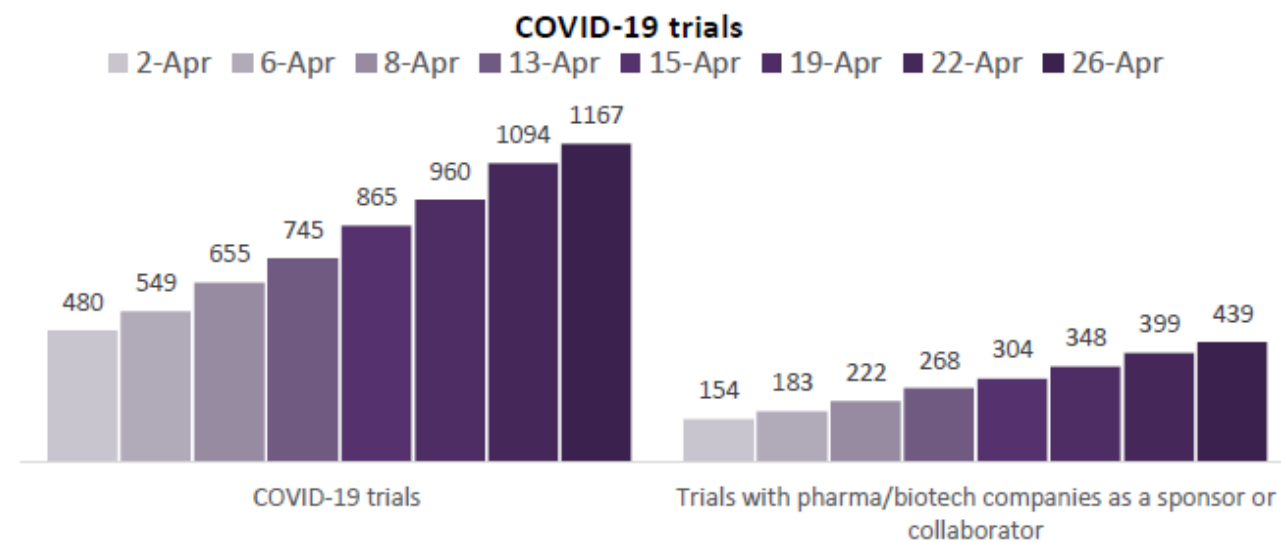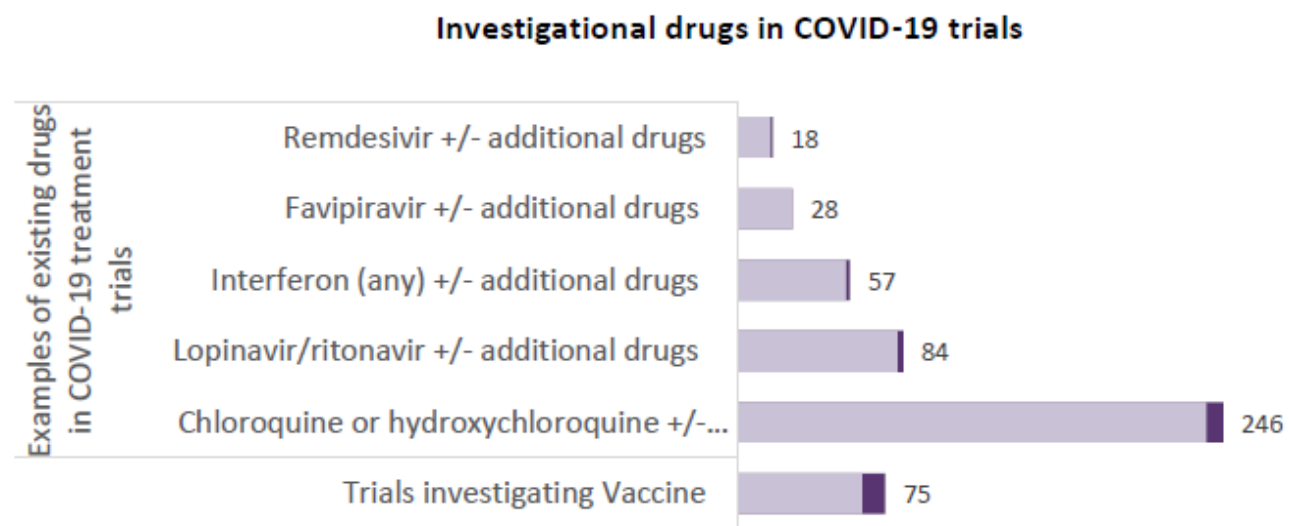

**Supporting Figure S1.** Clinical investigations for therapeutics and vaccines in COVID-19 (as of April 26, 2020). Source: GlobalData Healthcare analysis; Client and Subject Matter Expert Interviews; Press Articles; Verdict Media
